# Supplementary material
Source: PubMed Central journal article supplement (PMC8396162)

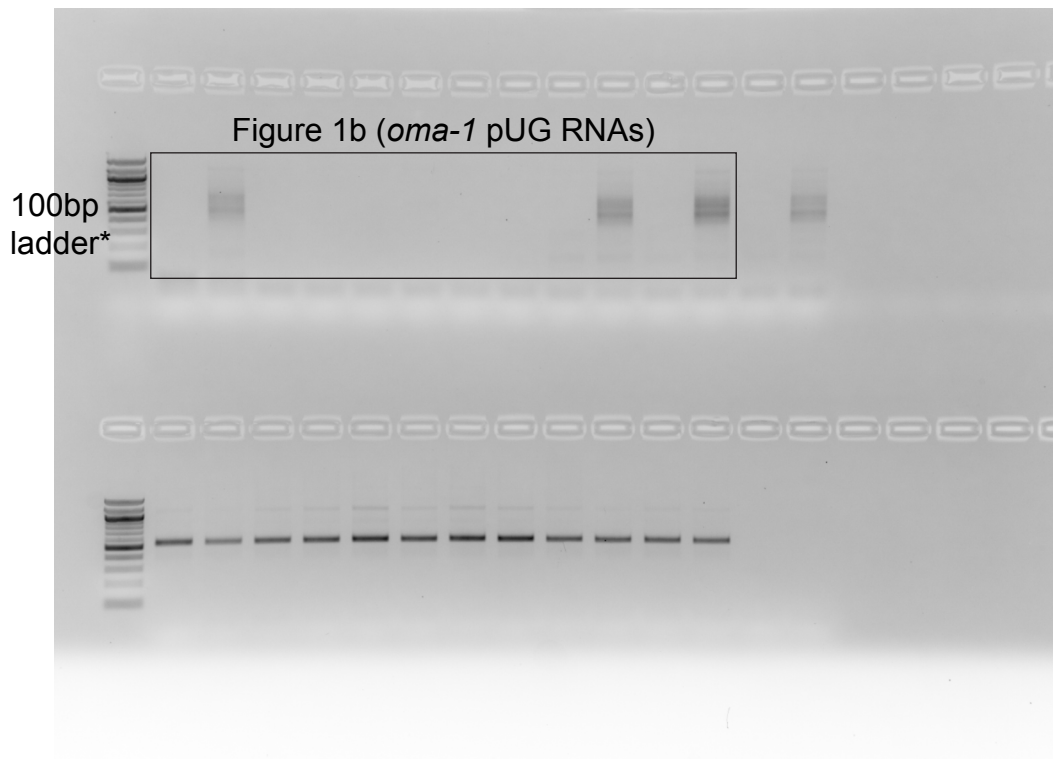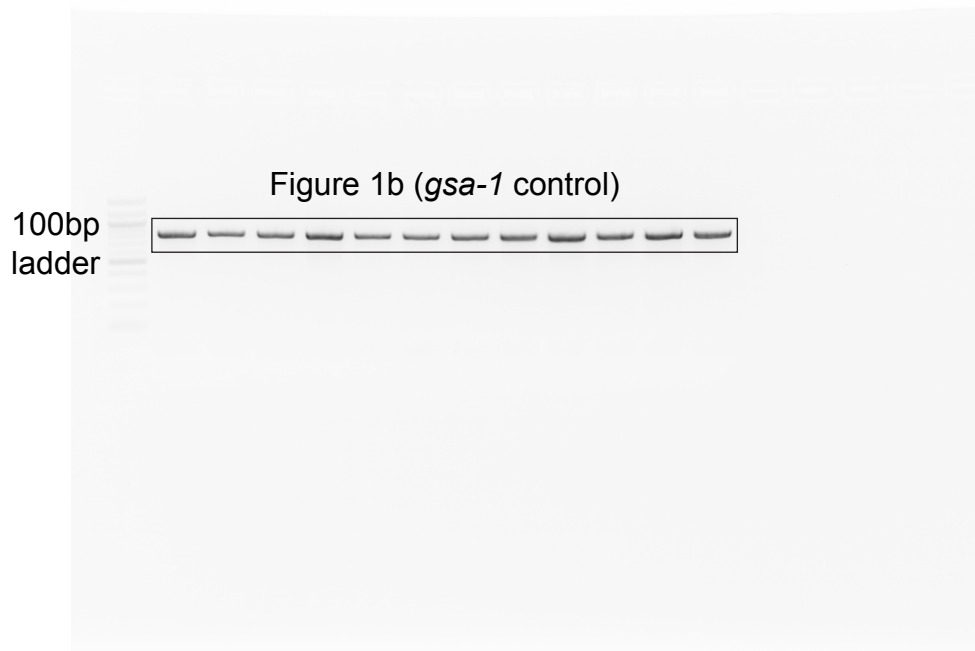

\* 100bp ladder for all gels is Quick-Load 100bp DNA ladder from New England Biolabs

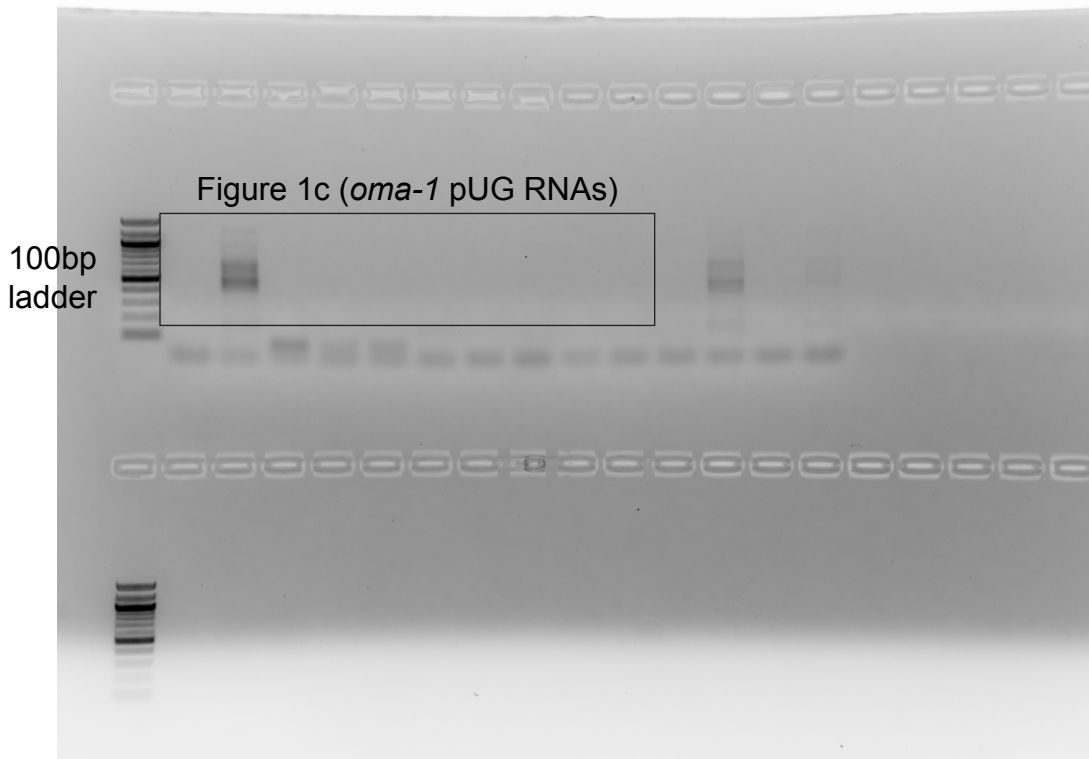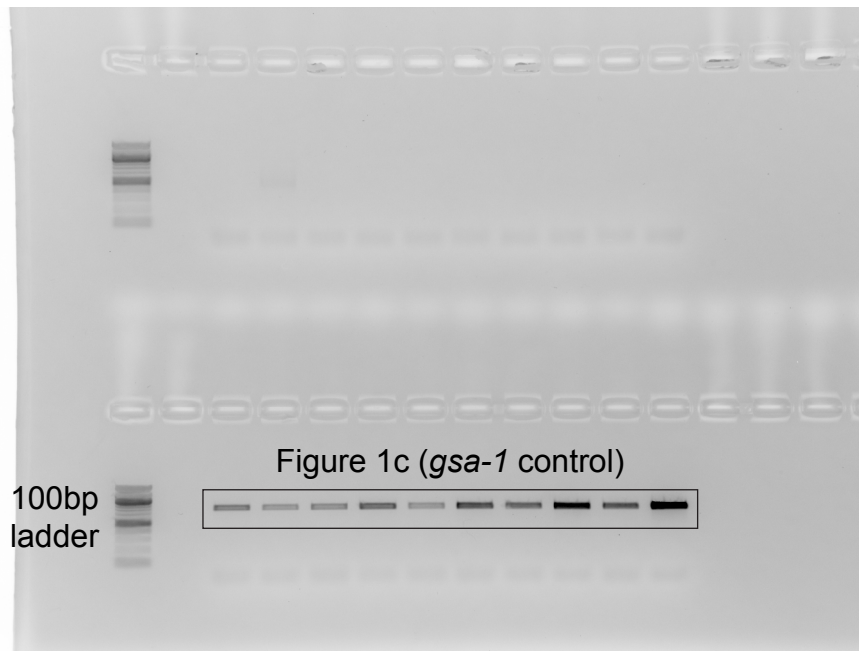



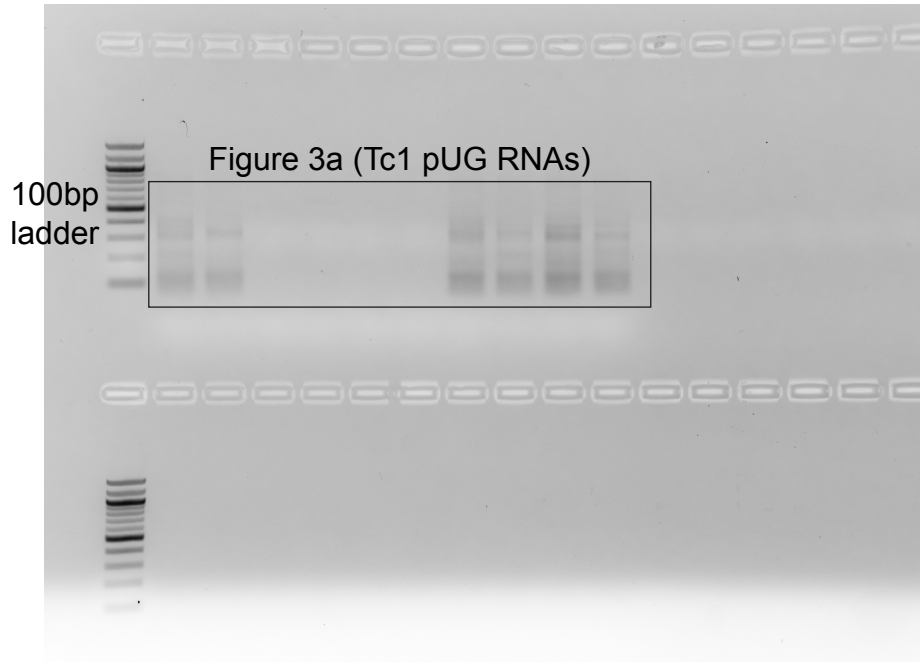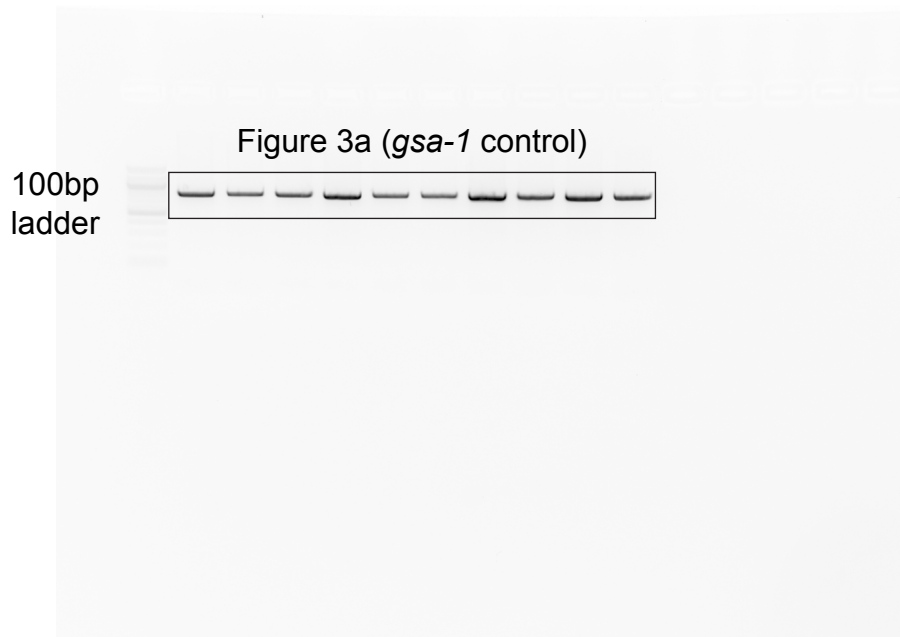

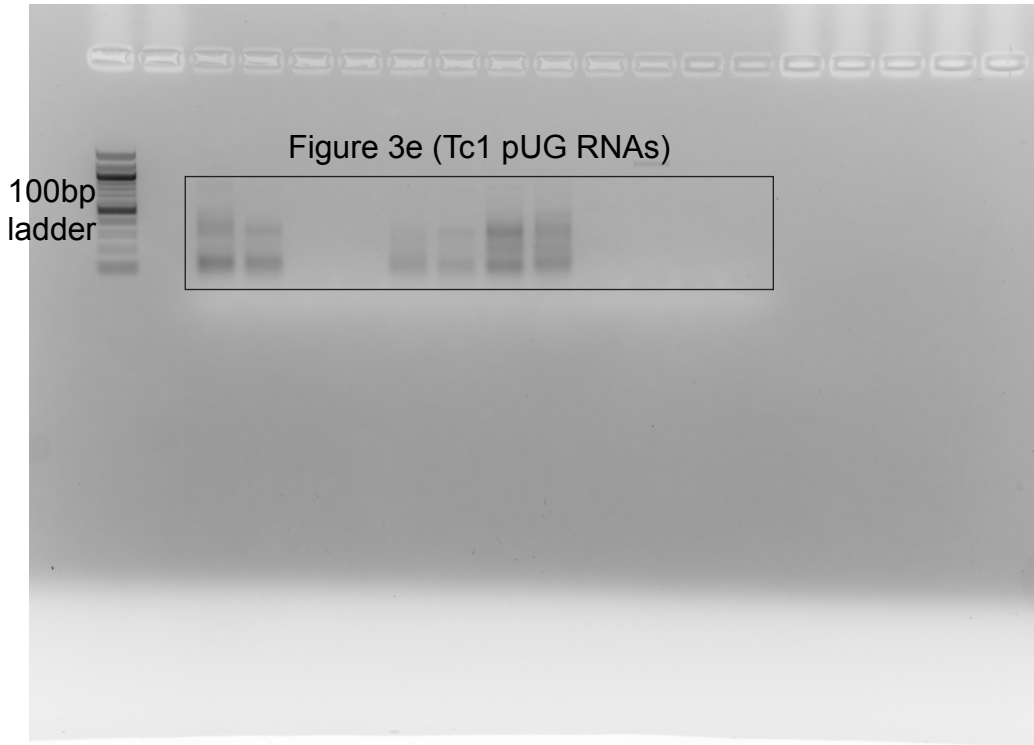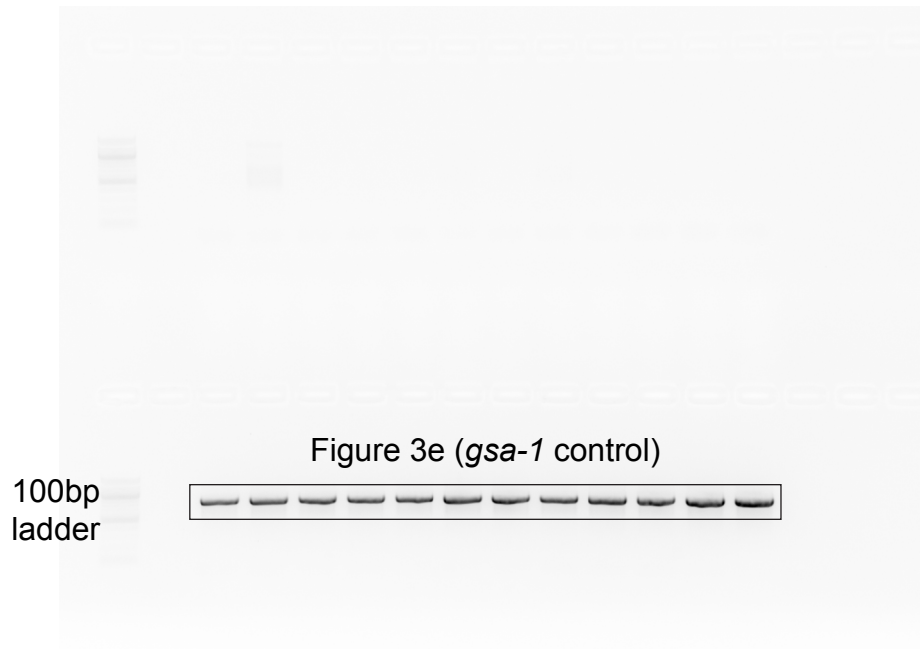

Inputs

Figure 4c

Figure 4b

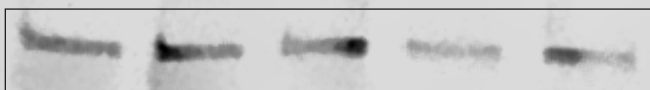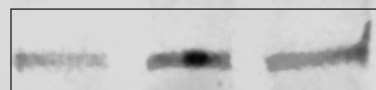

Precision Plus Protein Kaleidoscope Prestained  
Protein Standards (Bio-Rad)

Pull-downs

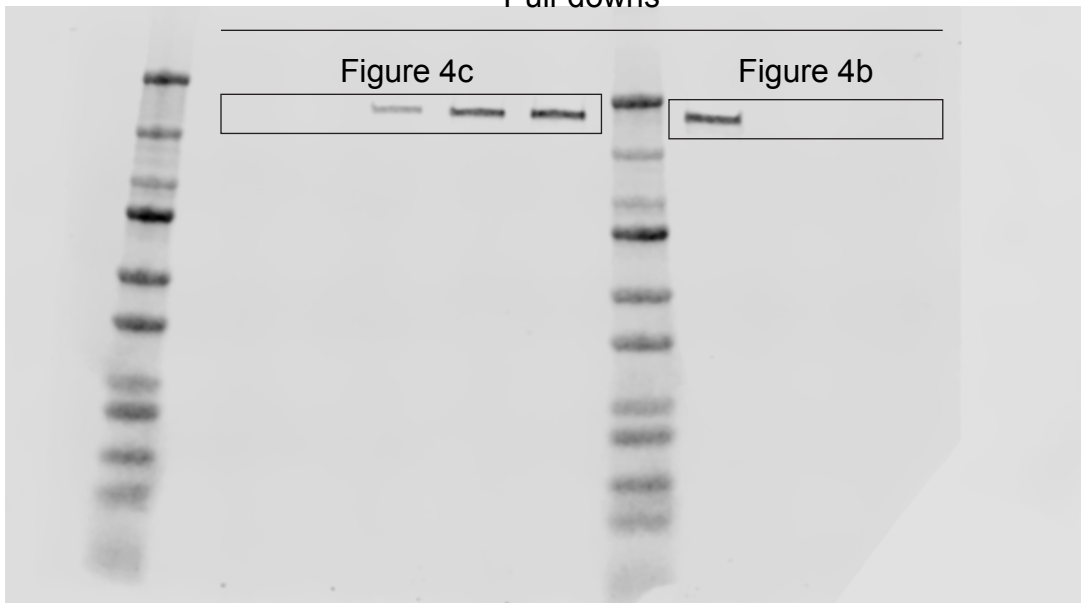

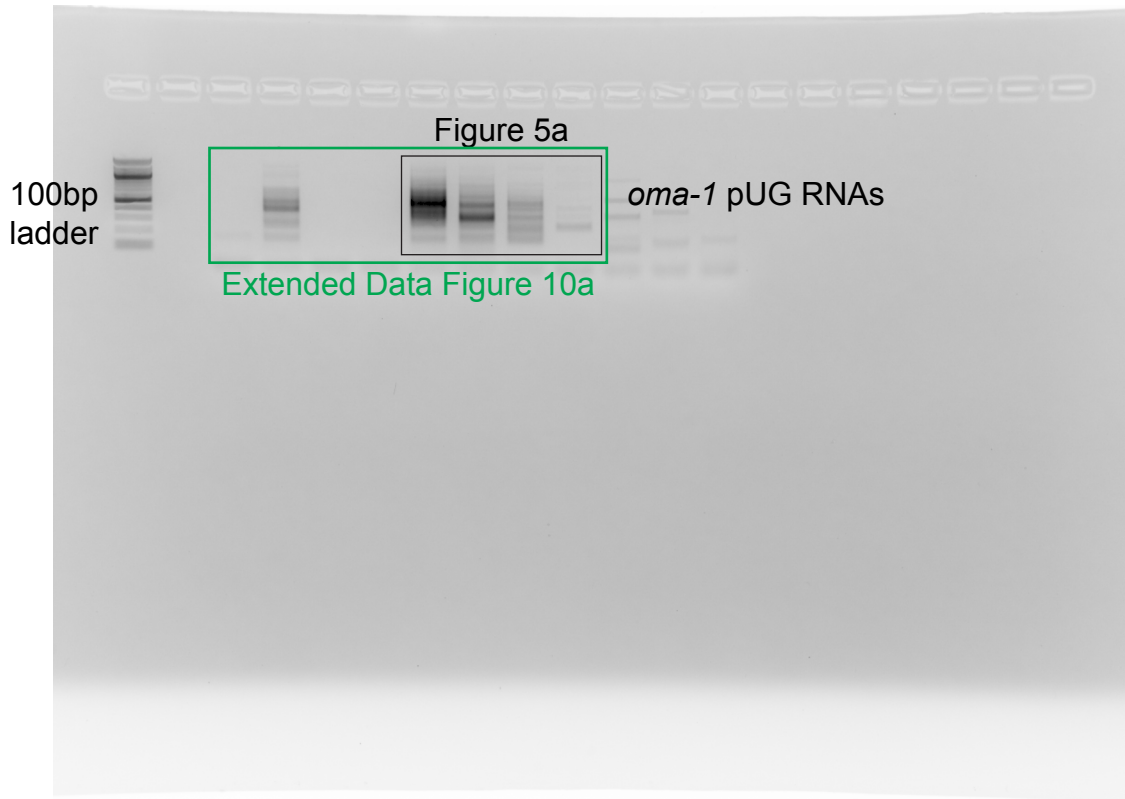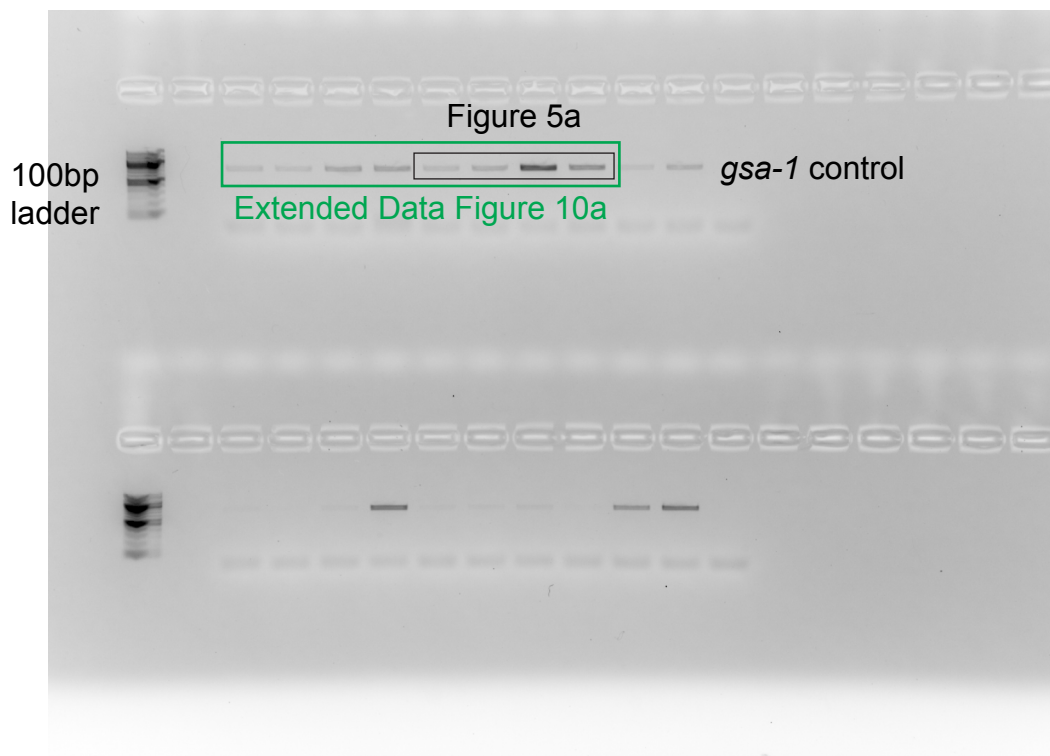

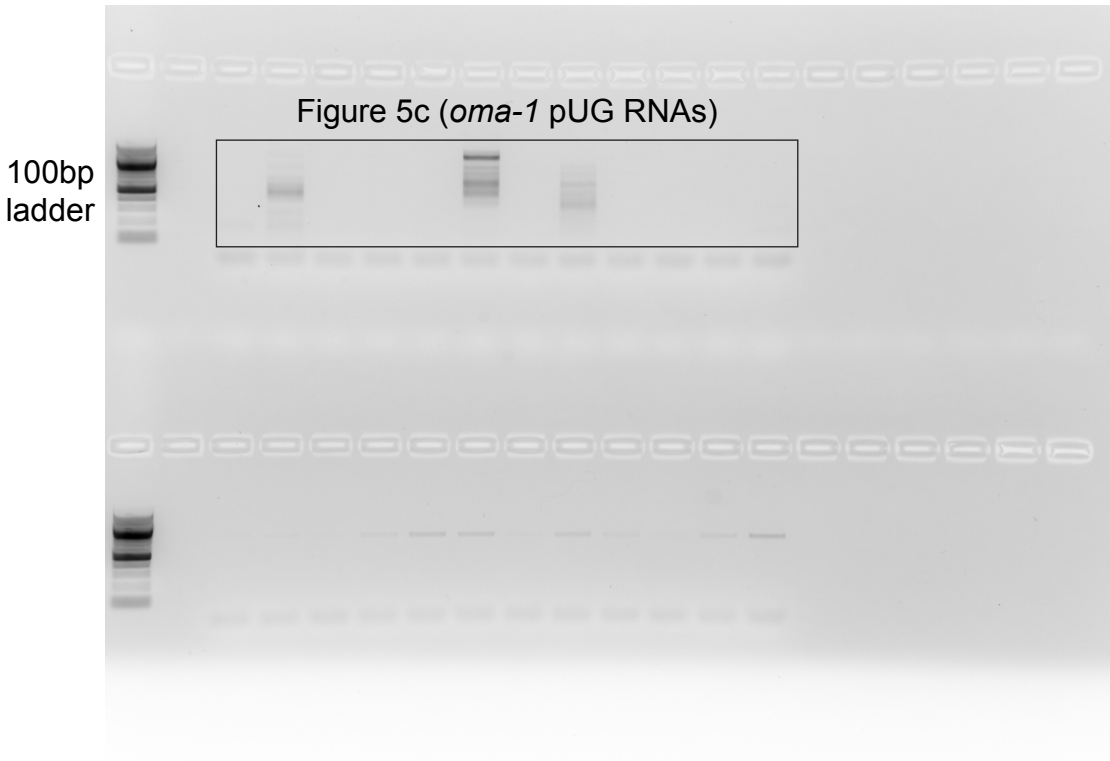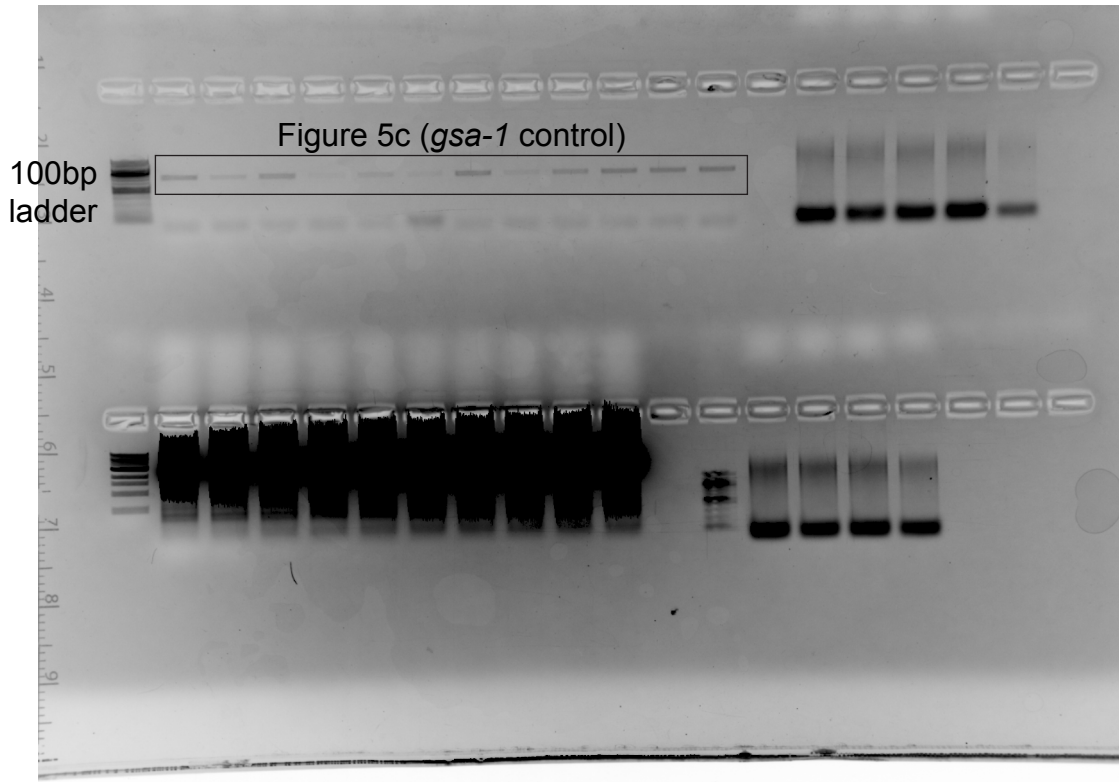

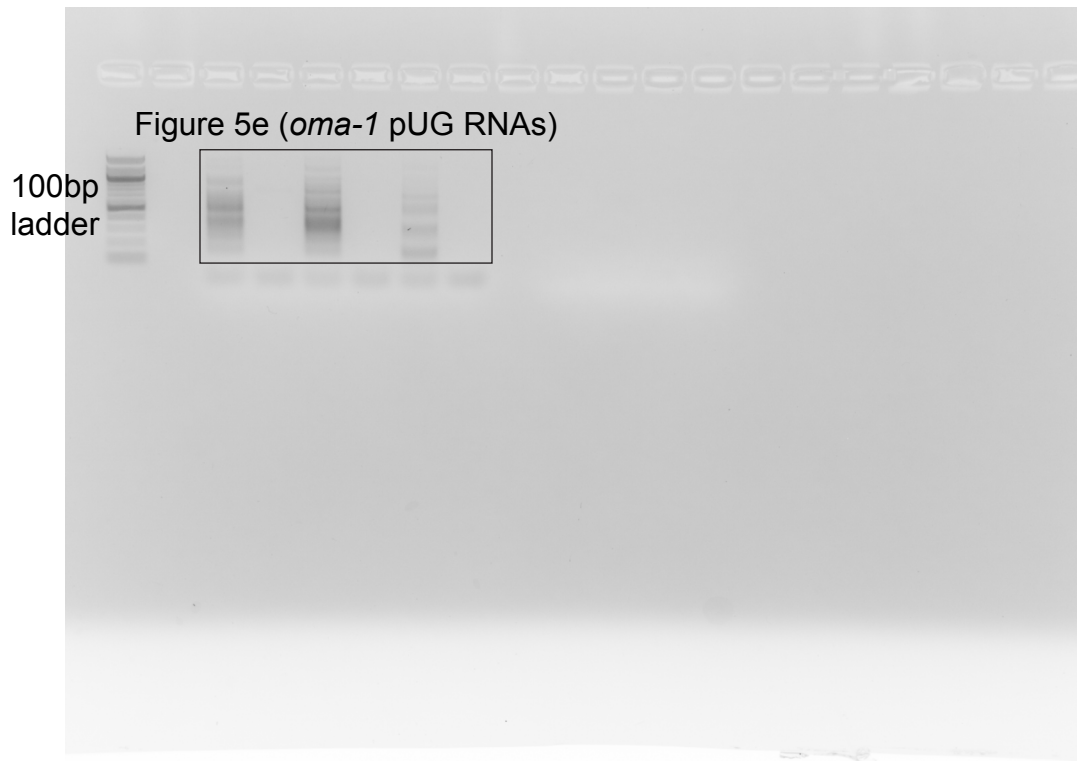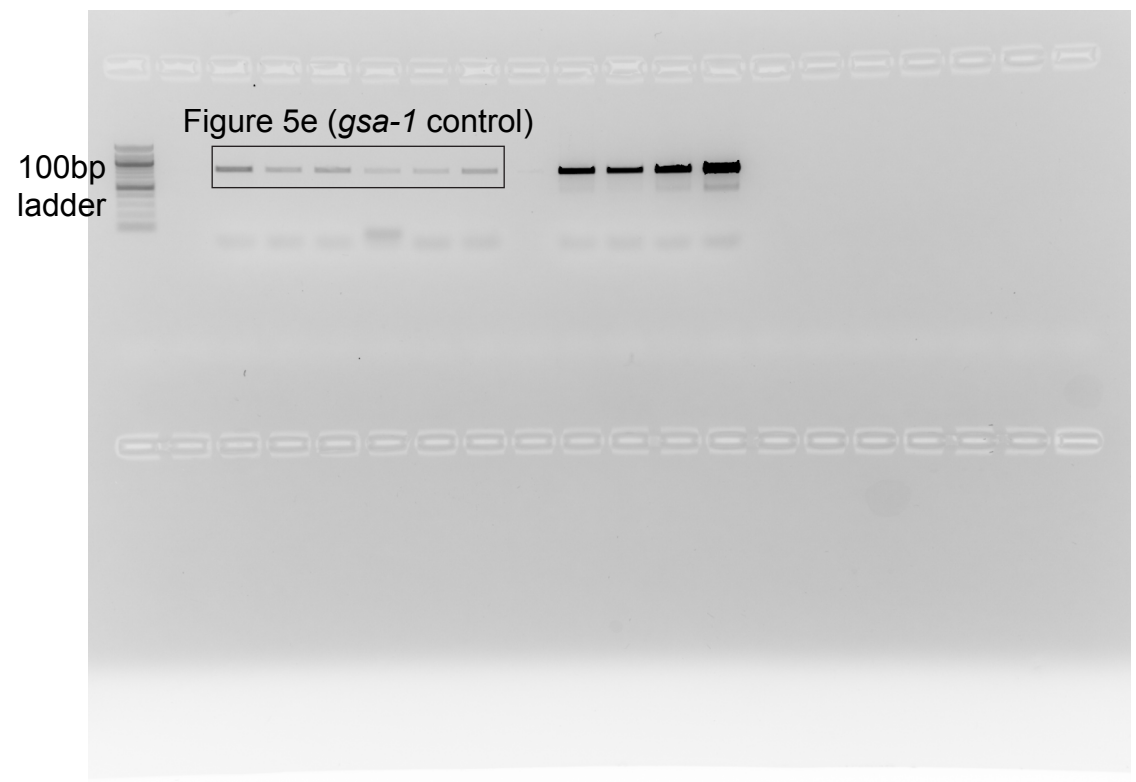



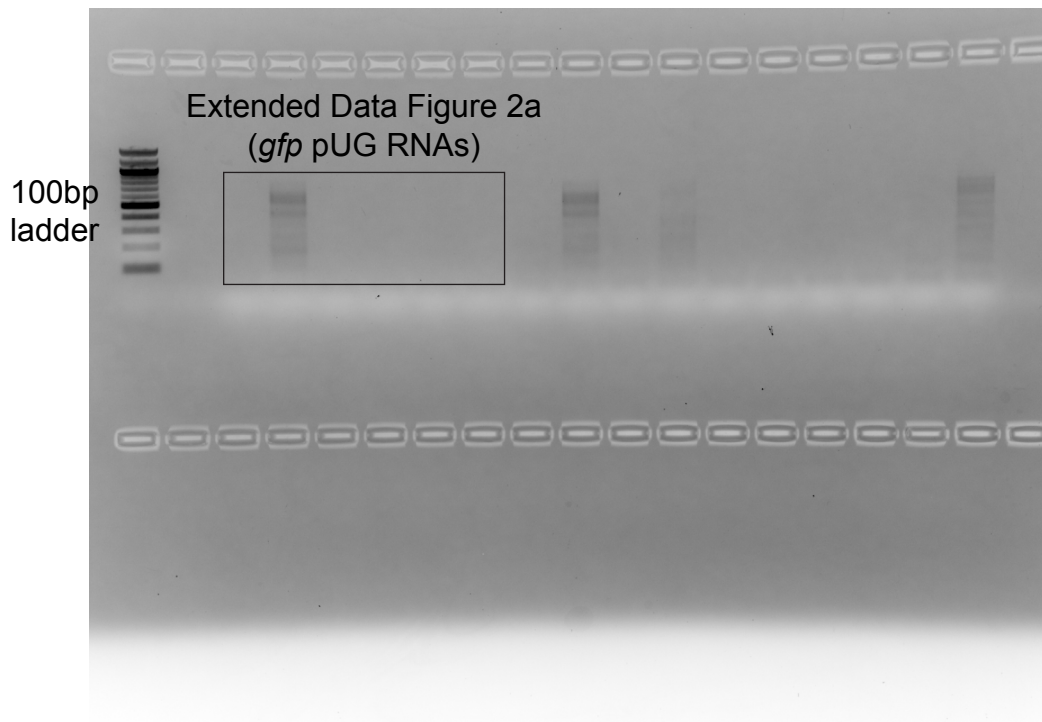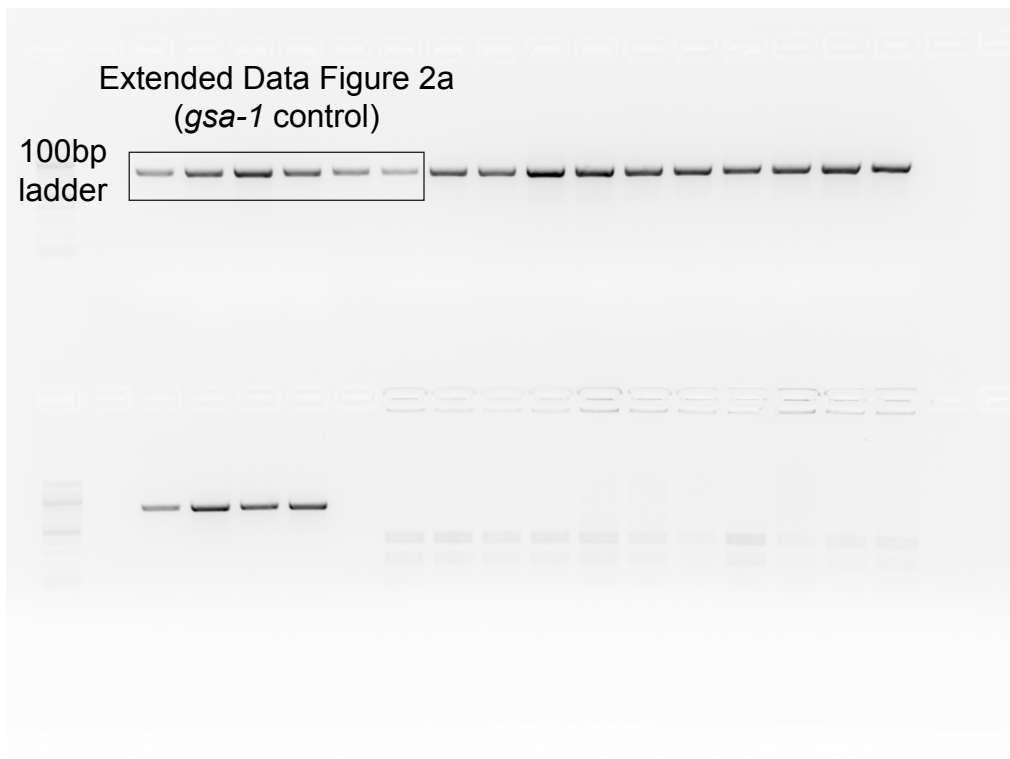

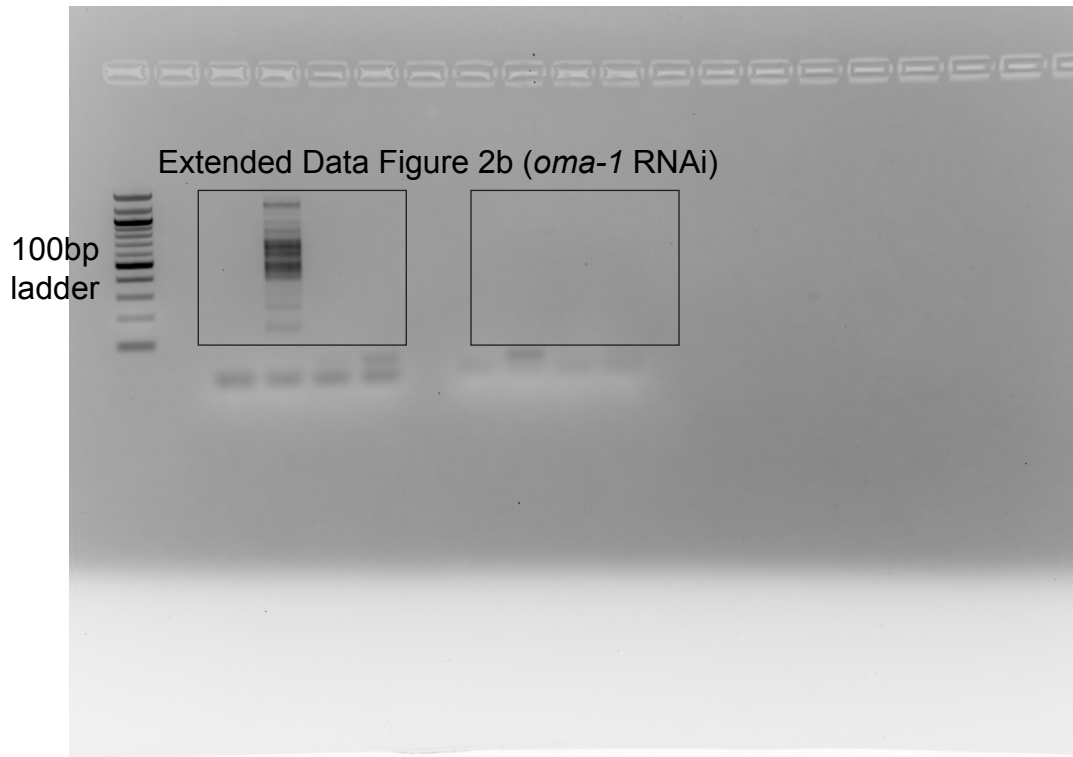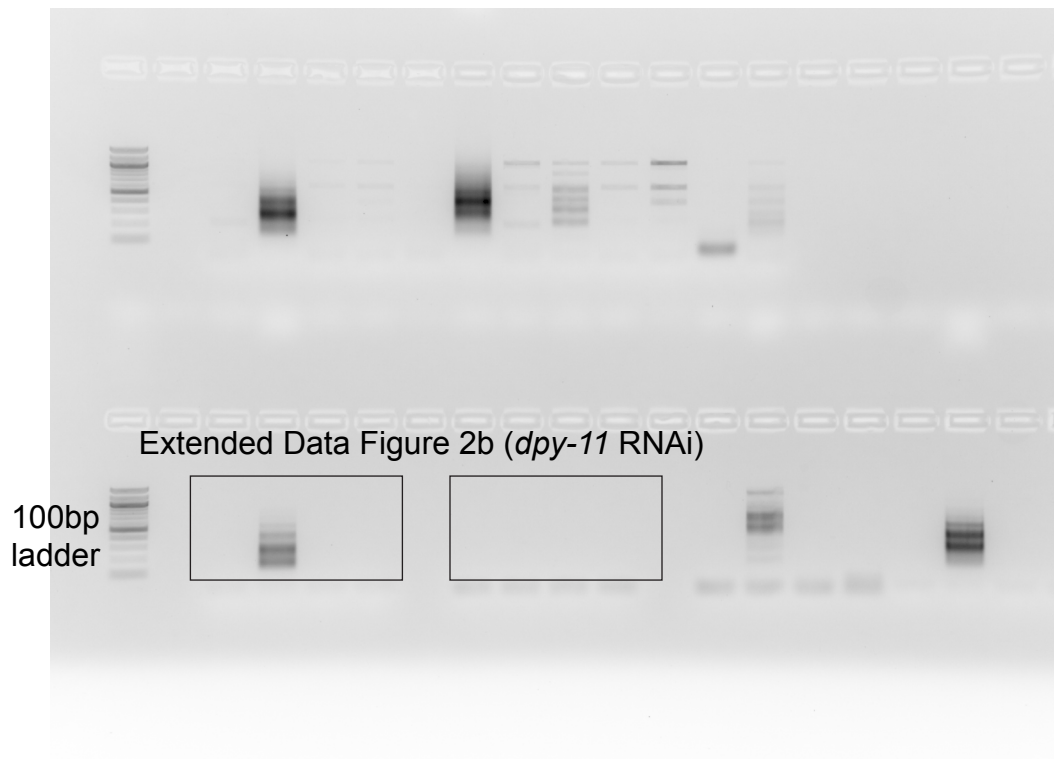

Extended Data Figure 2b  
*gsa-1* control for *dpy-11* RNAi experiment

100bp  
ladder

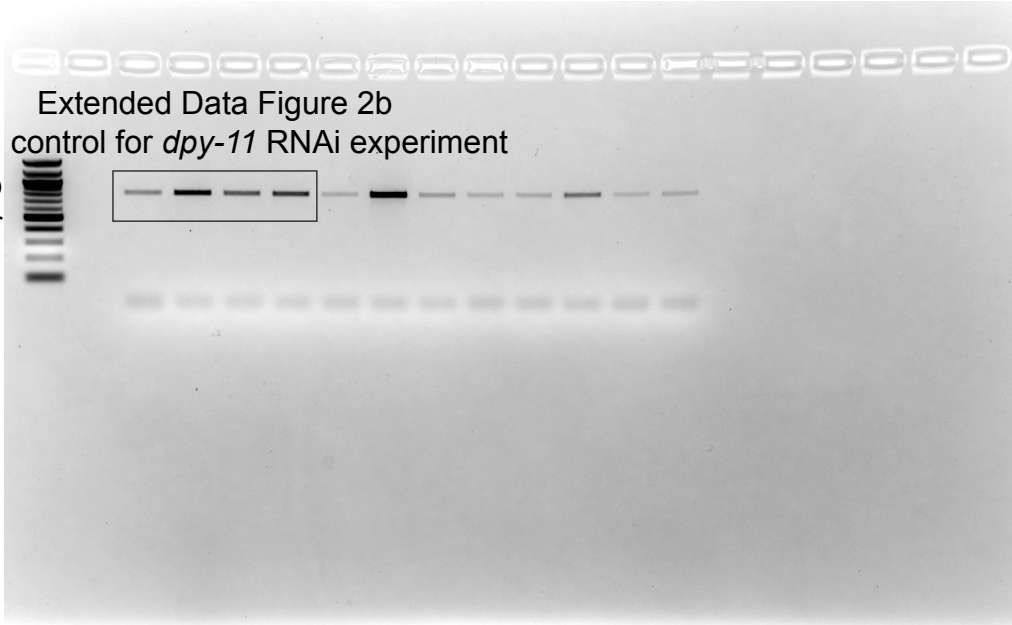

Extended Data Figure 2b  
*gsa-1* control for *oma-1* RNAi experiment

100bp  
ladder

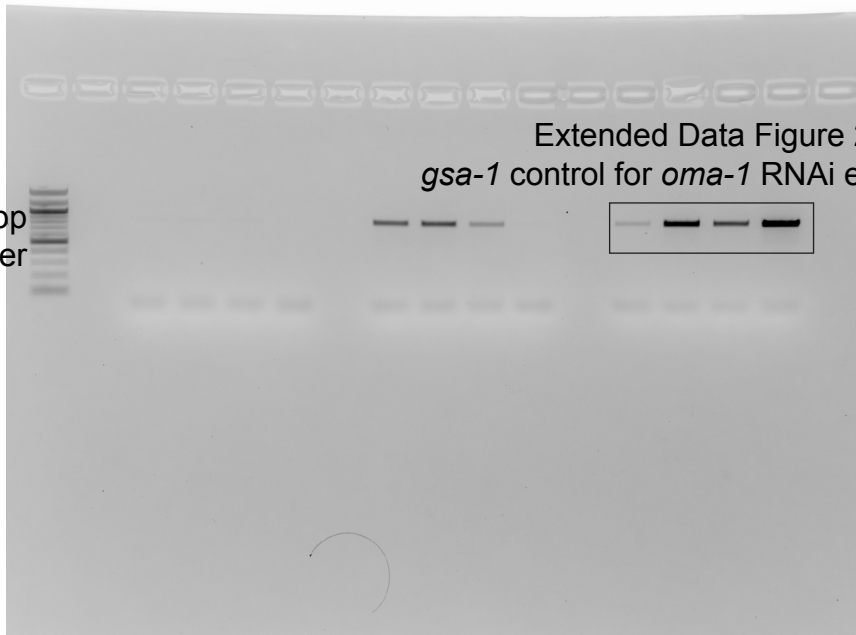

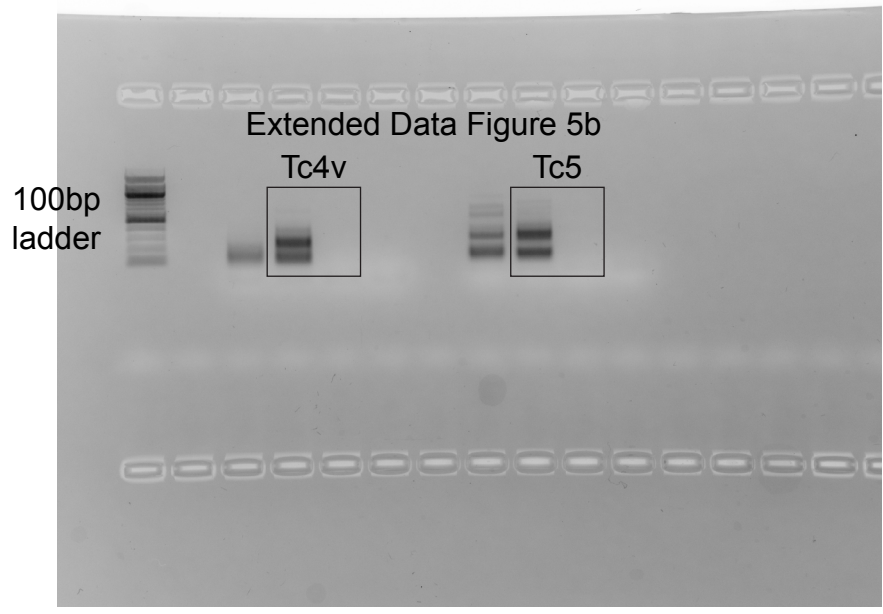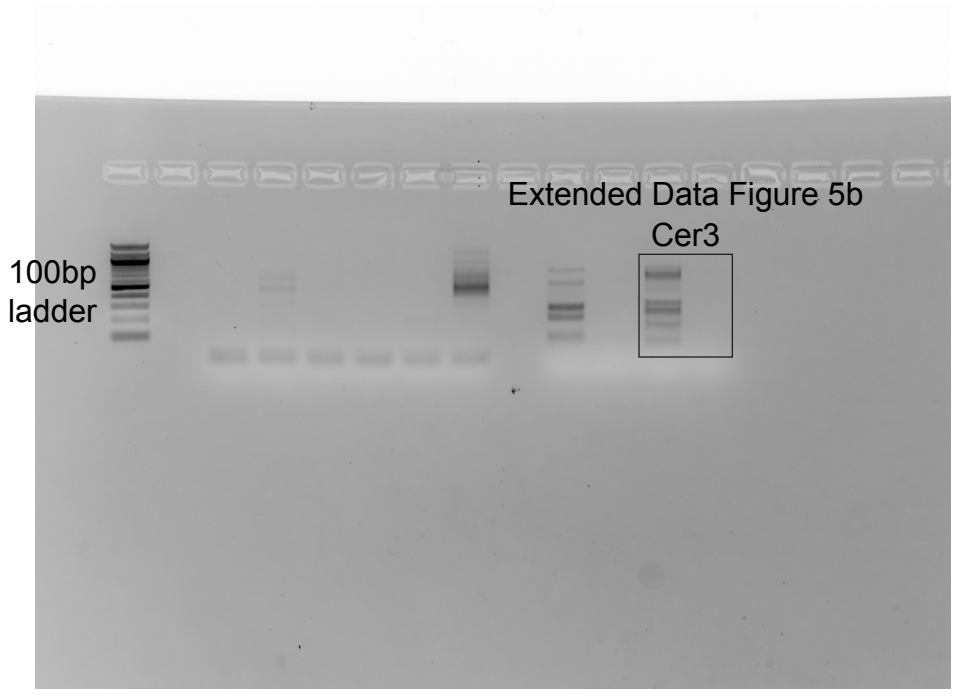

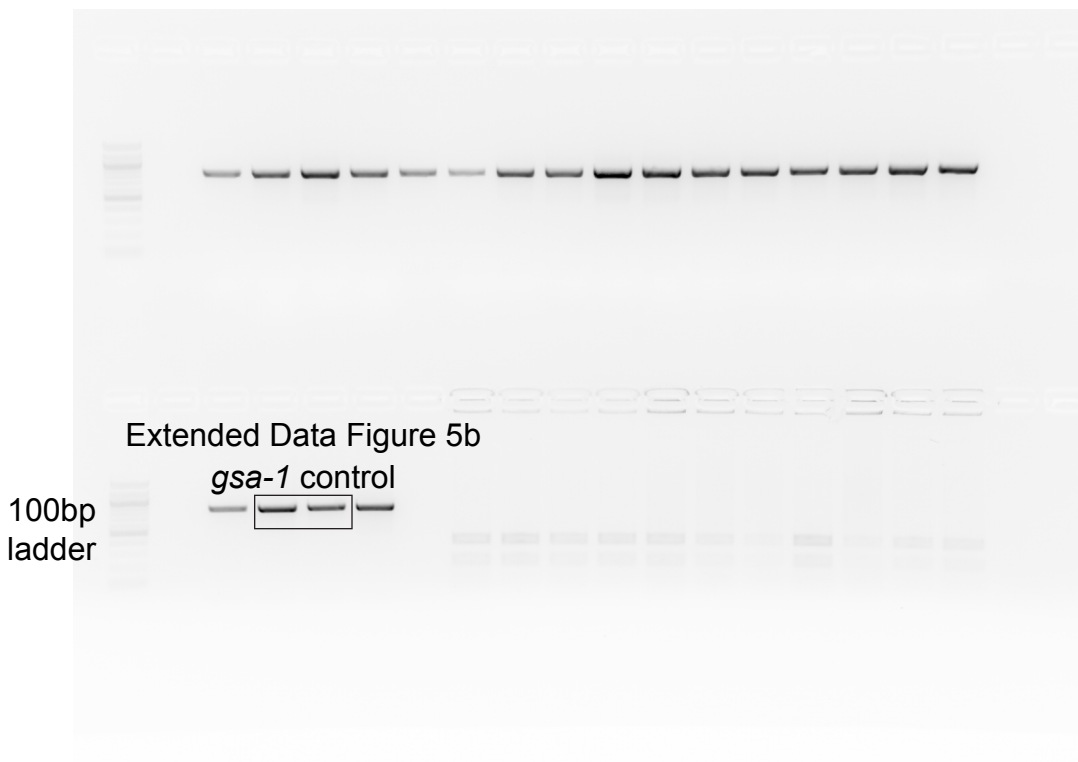

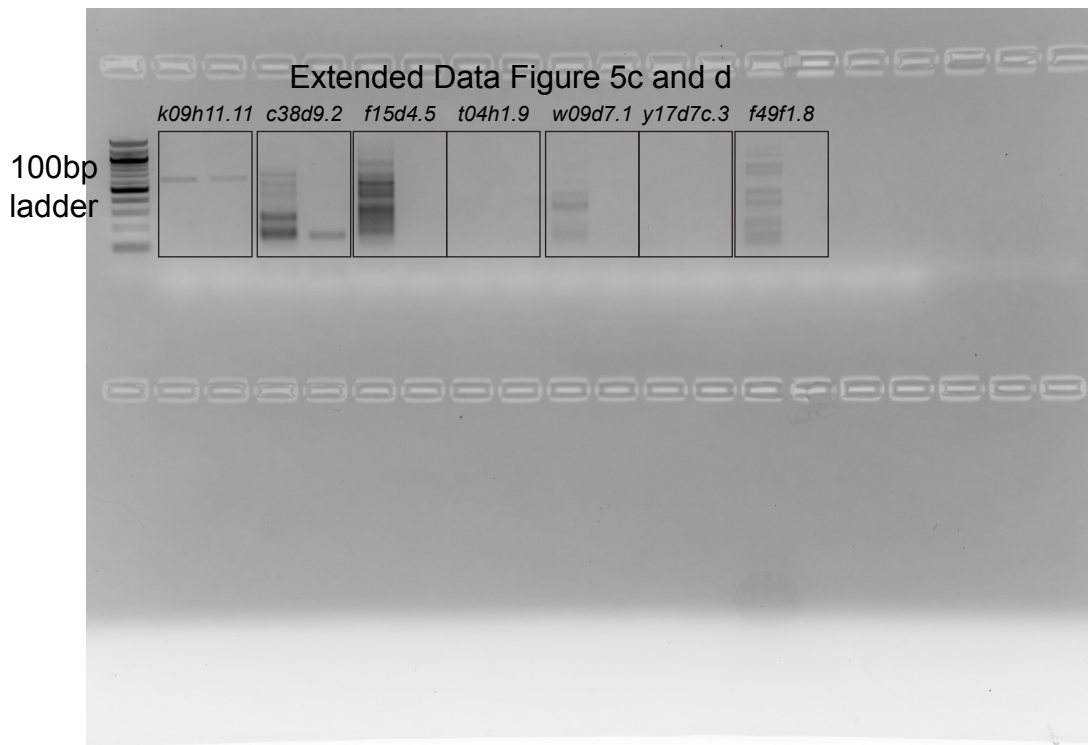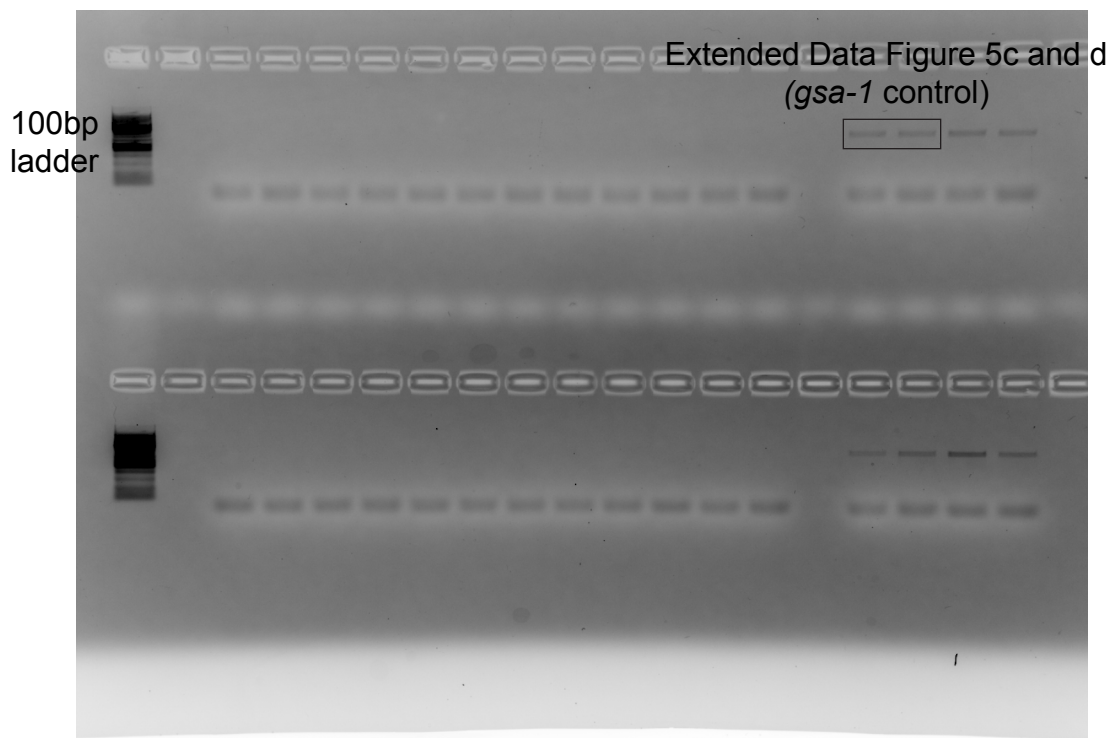



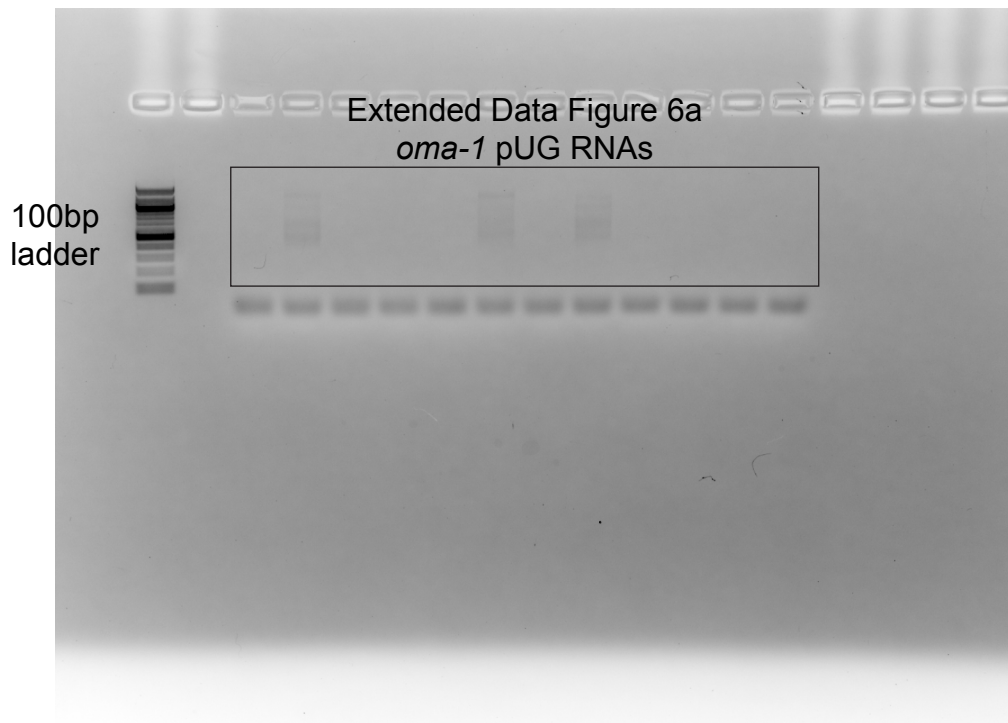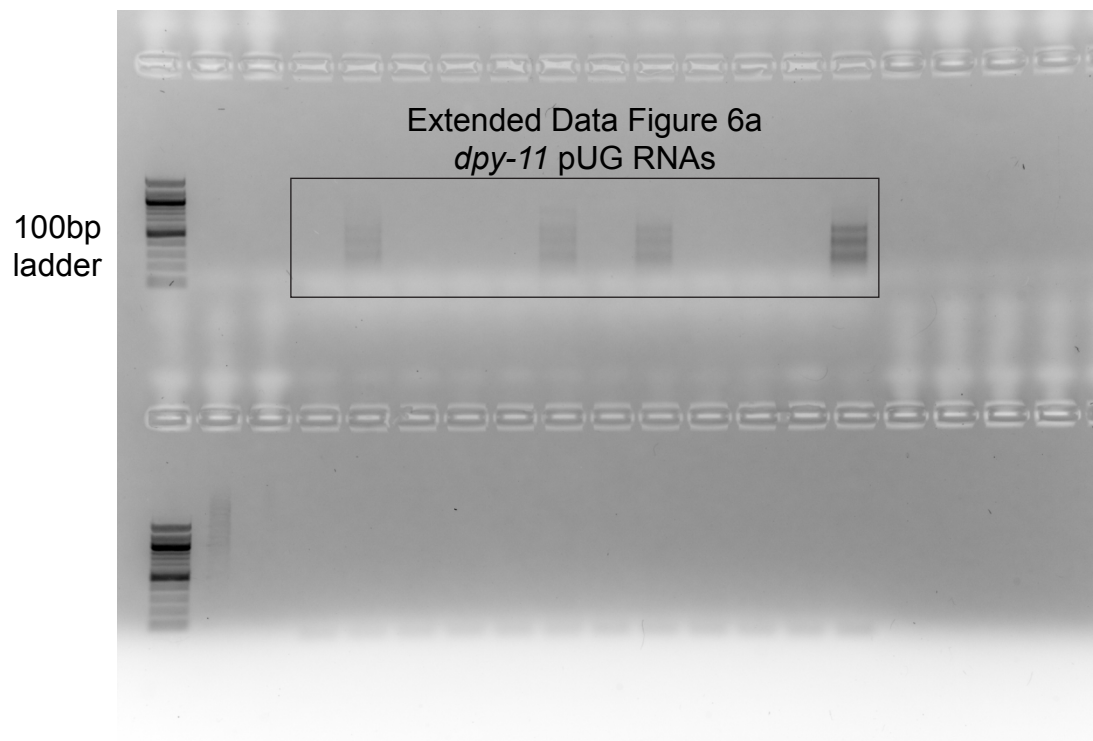

\* Loading control is the same as Figure 3e



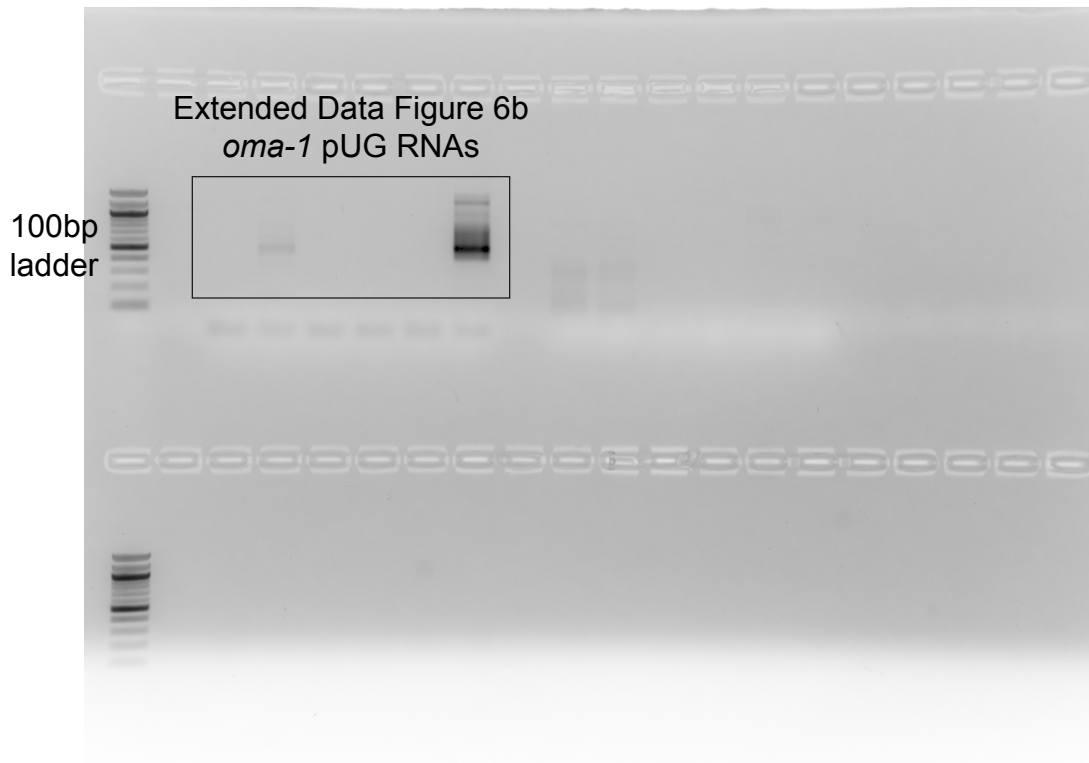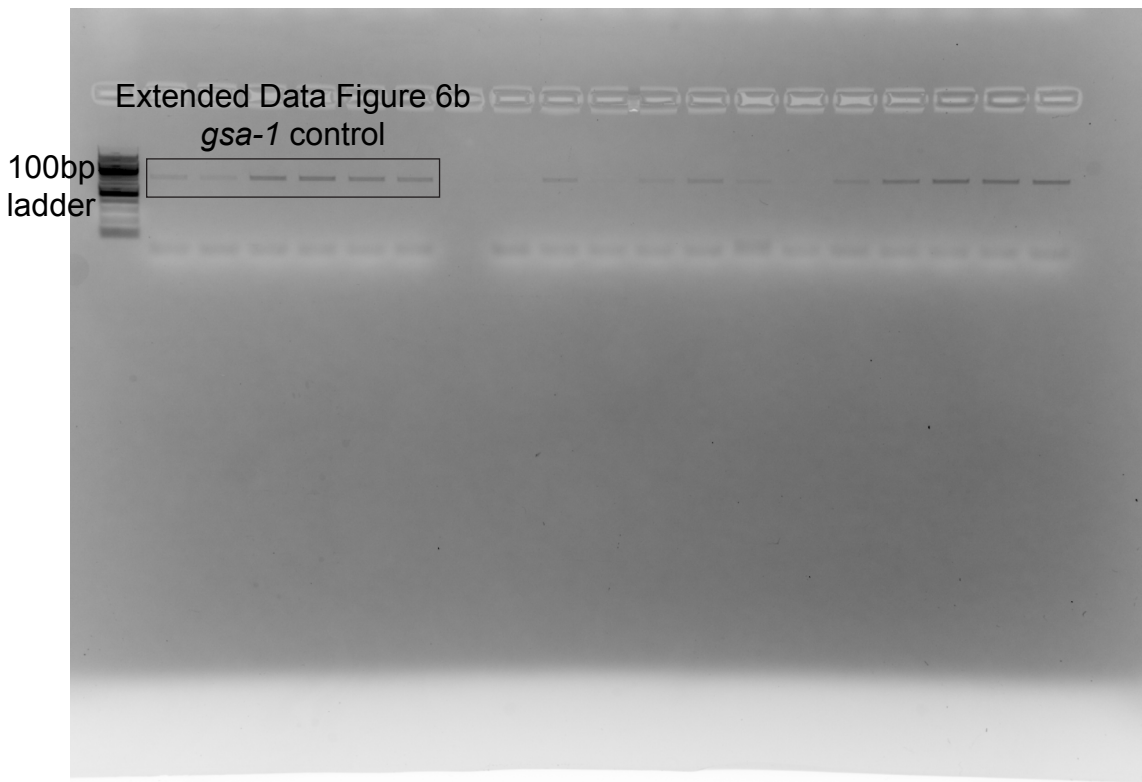

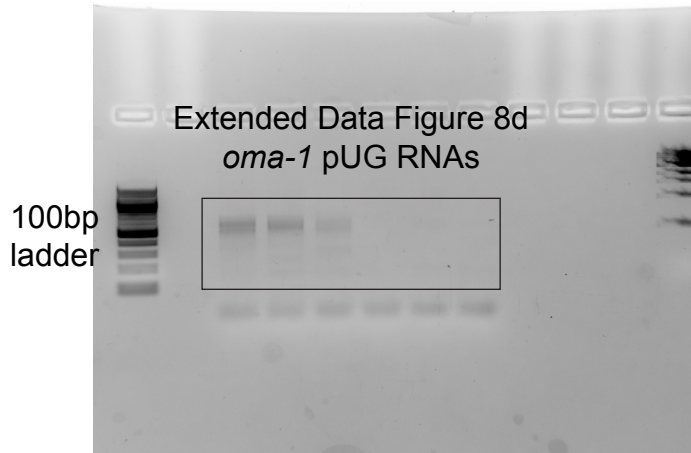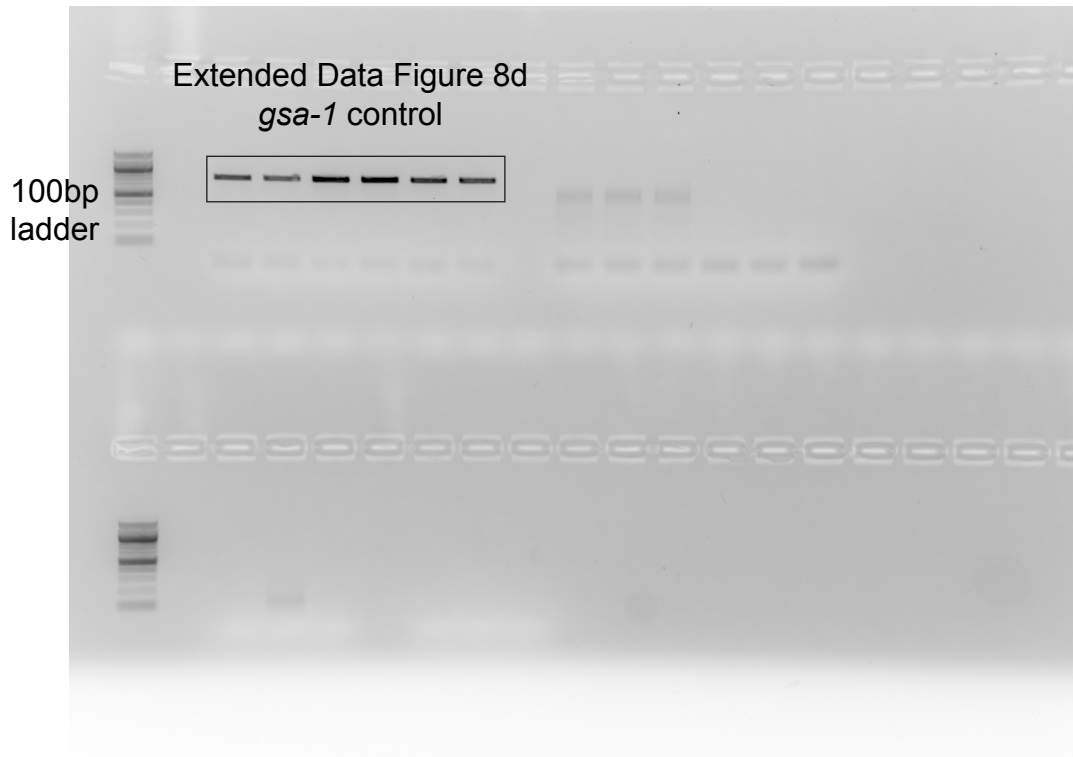

Supplement: NIHMS1585626-supplement-1585626_Supp_info_1.pdf [file NIHMS1585626-supplement-1585626_Supp_info_1.pdf]
